# Supplementary material for: Results of a Multicenter Randomized Controlled Trial of the Clinical Effectiveness of Schema Therapy for Personality Disorders
Source: Atypon-hosted journal article supplement (doi:10.1176/appi.ajp.2013.12040518), 2013-12-10
Supplement: 305_ds001.pdf [file 305_ds001.pdf]

 


Psychiatry Online
